# Supplementary material for: An ultrasound enhanced catalytic ozonation process for the ultra-deep desulfurization of diesel oil
Source: Royal Society of Chemistry journal article supplement (doi:10.1039/d0nj03368e), 2020-01-01
Supplement: d0nj03368e1.pdf [file d0nj03368e1.pdf]

**Electronic Supplementary Information**

**Title: Ultrasound enhanced catalytic ozonation process for ultra-deep desulfurization of diesel oil**

**Authors: Rui Wang <sup>a\*</sup>, Yan Zhao,<sup>a</sup> Ivan V. Kozhevnikov,<sup>b</sup> Jie Zhao<sup>a</sup>**

**Published Journal: New Journal of Chemistry**

a. School of Environmental Science and Engineering, Shandong University, No. 27

Shanda South Road, Jinan 250199, China. E-Mail: wangrui@sdu.edu.cn

b. Department of Chemistry, The University of Liverpool, Liverpool, UK

\*Corresponding author. E-mail: wangrui@sdu.edu.cn

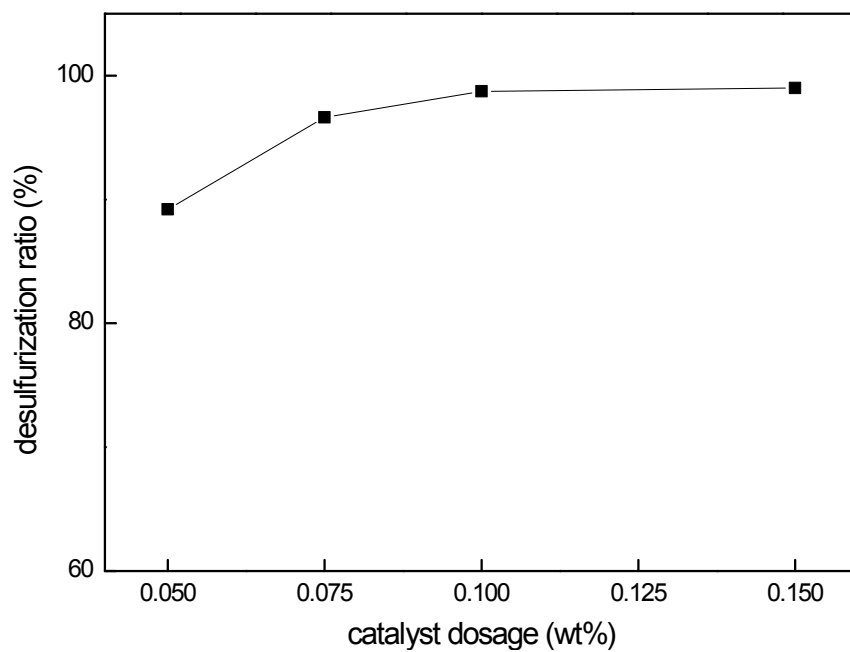

**Fig. S1.** The desulfurization ratio curves over catalyst dosage. (The condition was as that described in Fig. 3, and the reaction time was determined as 120 min).

**Table S1.** The evaluation of selectivity to the supported catalysts for ODS.

| Model oil | Desulfurization ratio/% |                                    |
|-----------|-------------------------|------------------------------------|
|           | After ODS treatment     | After ODS treatment with extration |
| Sample 1  | 96.10                   | 100                                |
| Sample 2  | 43.25                   | 94.31                              |
| Sample 3  | 24.10                   | 84.45                              |

Note: Sample 1 refers to the model oil containing 250 ppmw DBT, Sample 2 refers to the simulated oil containing 250 ppmw DBT and 10% n-octylene, Sample 3 refers to the model oil containing 250 ppmw DBT and 10% xylene; the condition is as described in figure. 12.

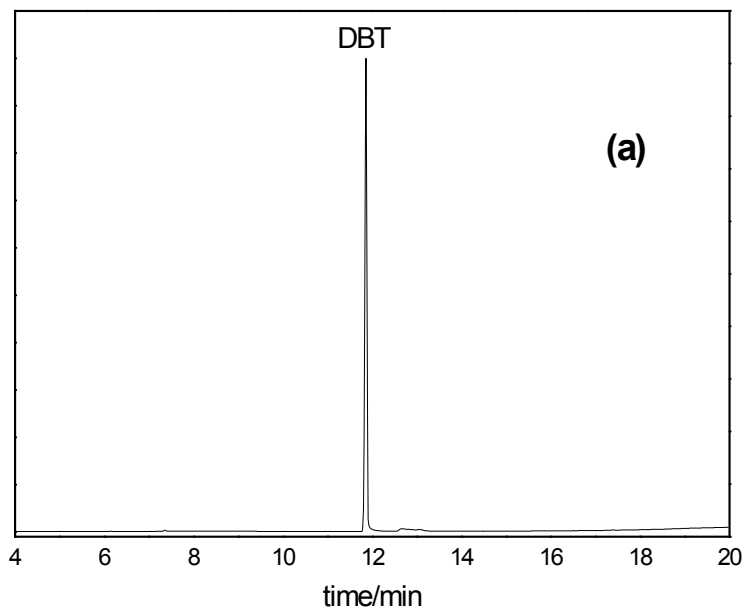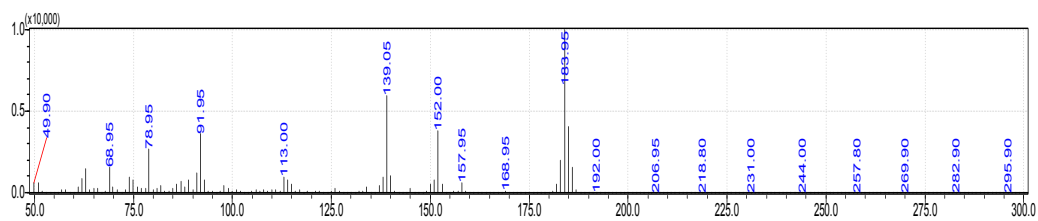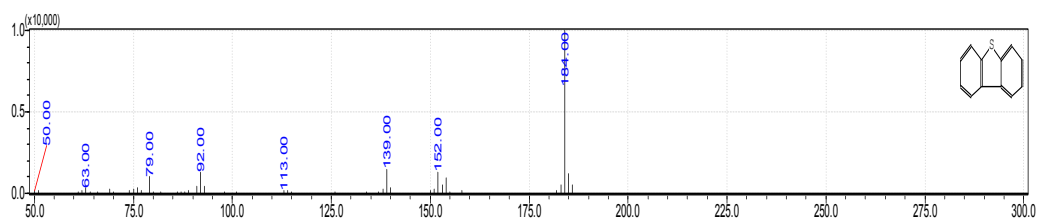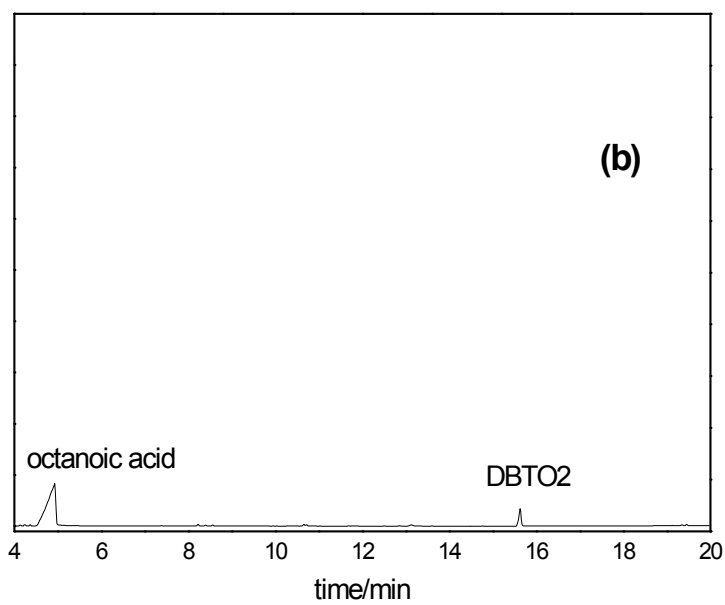

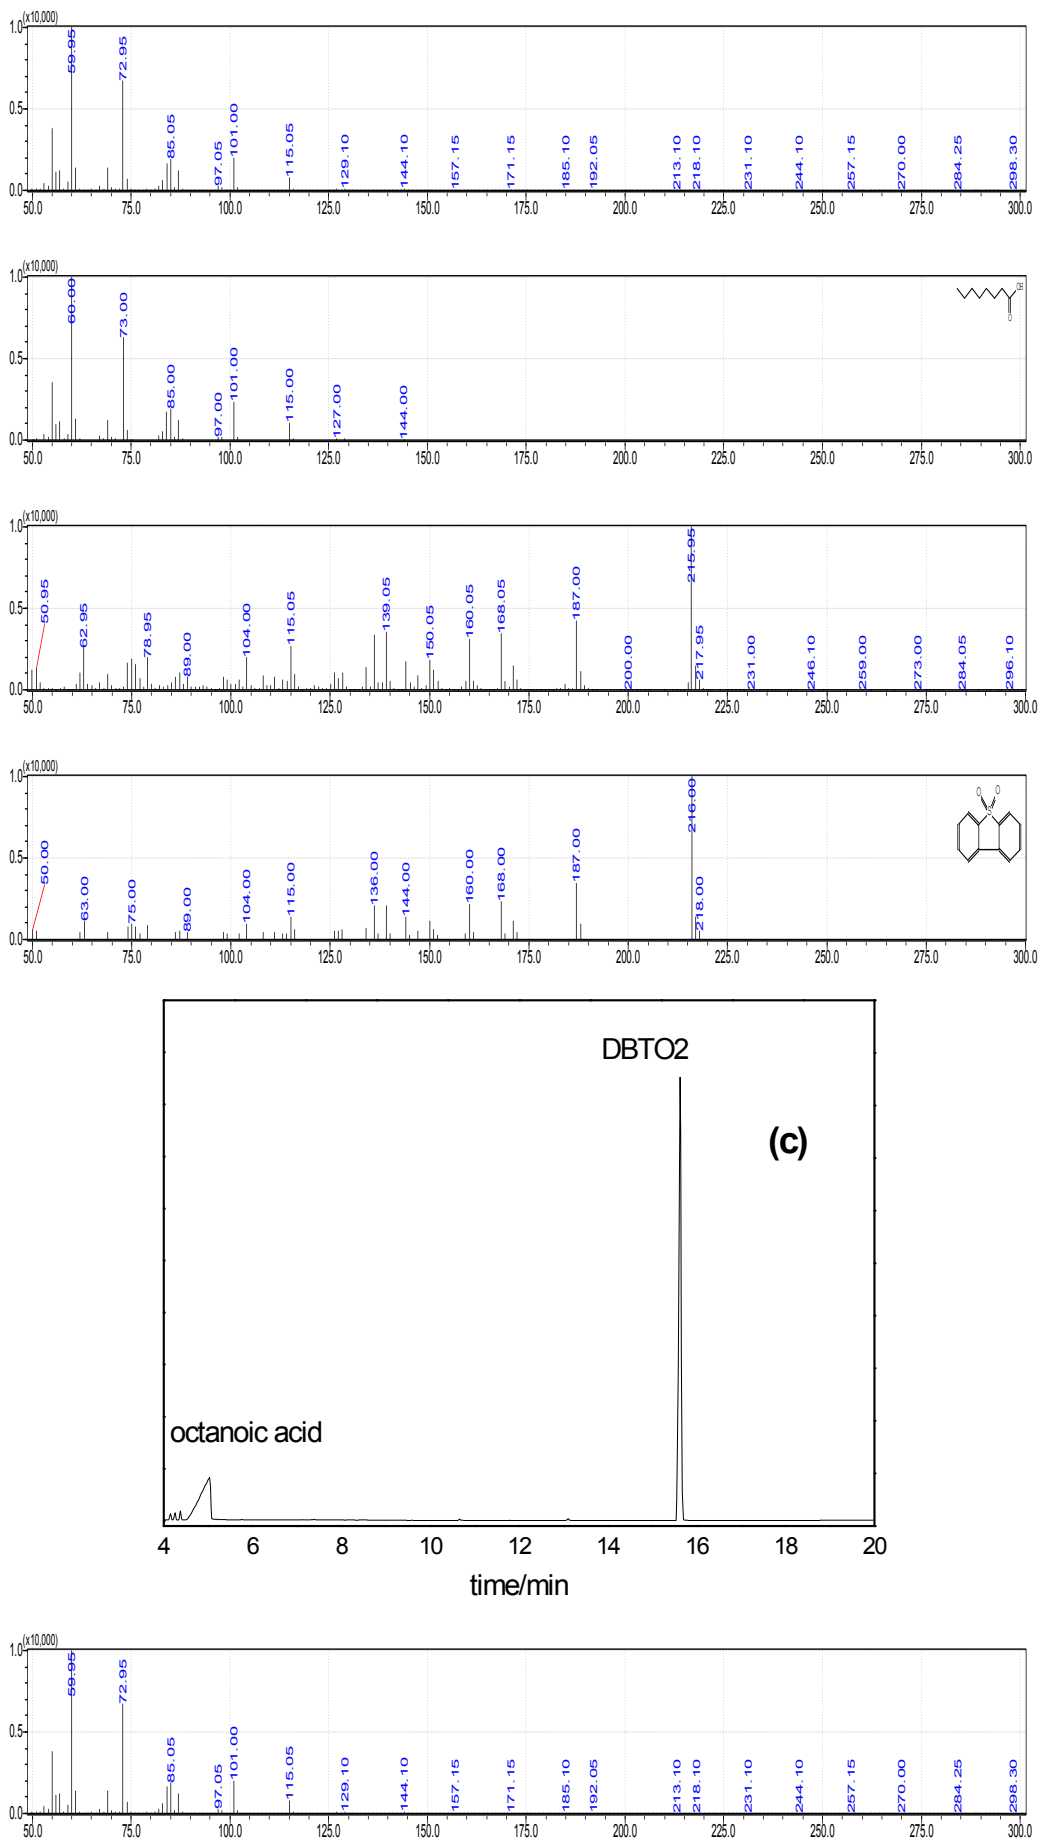

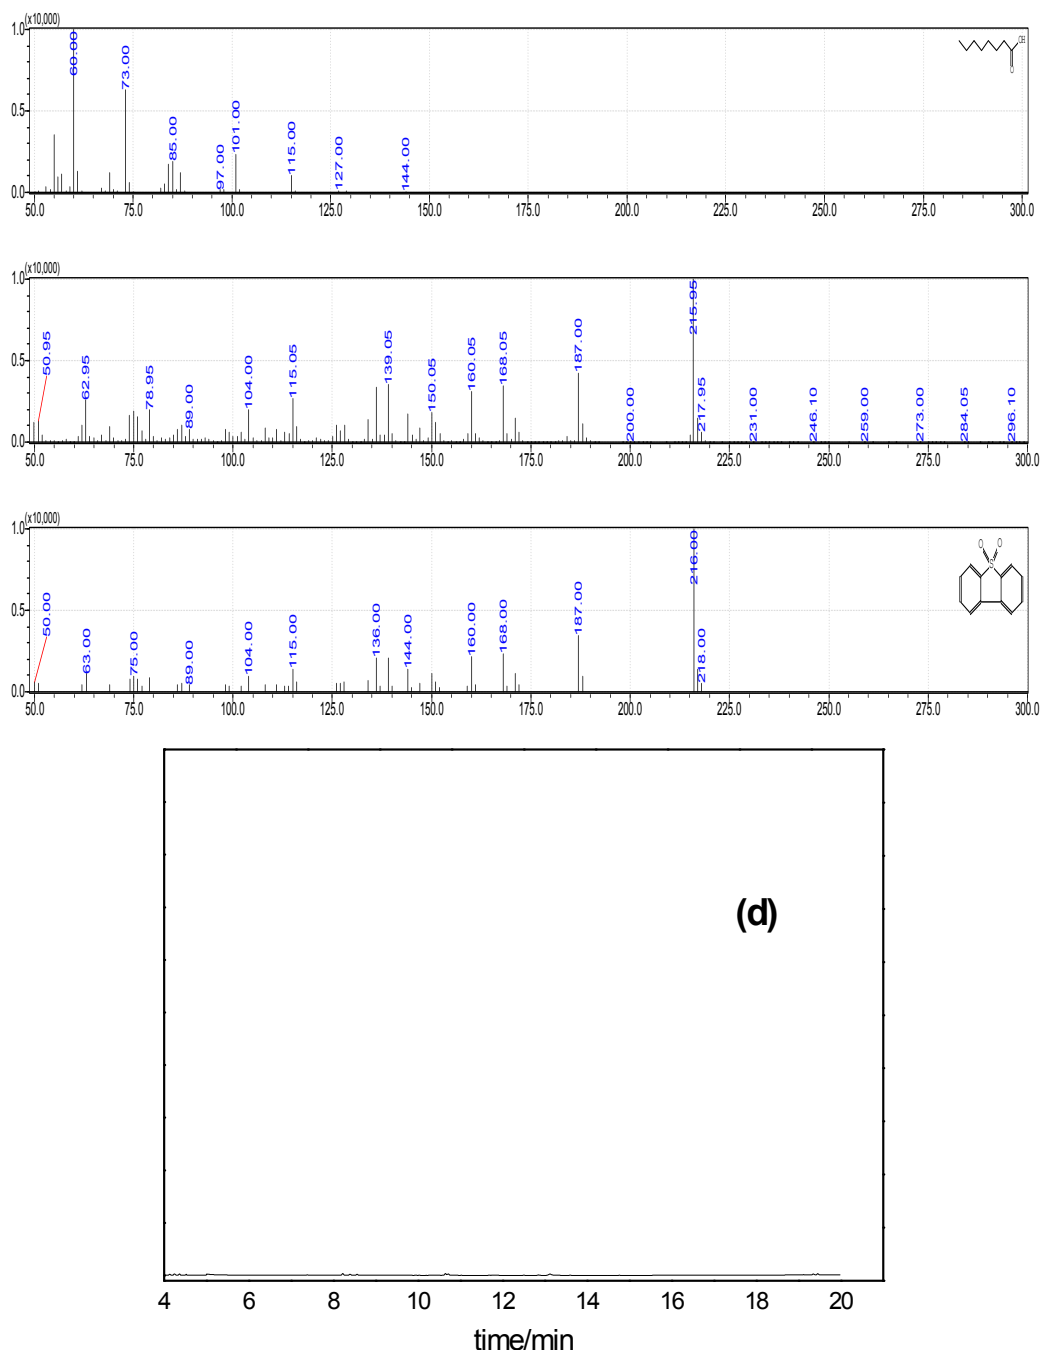

**Fig. S2.** The GC-MS spectra of the oxidation products ((a) before ODS reaction in the model oil; (b) after ODS reaction in the model oil; (c) after reaction in the eluent of catalyst; (d) after ODS reaction combined with extraction of MeCN in the model oil).

**Table S2.** The comparison between the different aerobic ODS systems.

| catalyst                                                                                                                                   | assistant          | Solvent | oxidant                                      | Temperature (°C) | Pressure             | Reused times | Sulfur removal (%) | Ref.      |
|--------------------------------------------------------------------------------------------------------------------------------------------|--------------------|---------|----------------------------------------------|------------------|----------------------|--------------|--------------------|-----------|
| Na <sub>4</sub> W <sub>10</sub><br>O <sub>32</sub> ·8H <sub>2</sub> O                                                                      | --                 | MeCN    | O <sub>2</sub> H <sub>2</sub> O <sub>2</sub> | 25               | 0.6 MPa              | --           | 99%                | S1        |
| H <sub>8</sub> PV <sub>5</sub><br>Mo <sub>7</sub> O <sub>40</sub>                                                                          | --                 | water   | O <sub>2</sub>                               | 120              | 20 bar               | --           | 99                 | S2        |
| [C <sub>18</sub> H <sub>37</sub><br>N(CH <sub>3</sub> ) <sub>3</sub> ] <sub>5</sub> [PV <sub>2</sub><br>Mo <sub>10</sub> O <sub>40</sub> ] | isobutyl aldehydes | MeCN    | O <sub>2</sub>                               | 60               | Atmospheric pressure | --           | 100                | S3        |
| CNTs                                                                                                                                       | --                 | --      | O <sub>2</sub>                               | 150              | Atmospheric pressure | 5            | 100                | S4        |
| HPW@<br>MOFs                                                                                                                               | --                 | MeCN    | O <sub>2</sub>                               | 90               | Atmospheric pressure | --           | 90                 | S5        |
| GO                                                                                                                                         | n-octanal          | --      | air                                          | 60               | Atmospheric pressure | 3            | 89.21              | S6        |
| K <sub>6</sub> P <sub>2</sub> W <sub>1</sub><br>O <sub>8</sub> O <sub>62</sub> /G<br>O                                                     | n-octanal          | --      | air                                          | 60               | Atmospheric pressure | 5            | 96.10              | This work |
| K <sub>6</sub> P <sub>2</sub> W <sub>1</sub><br>O <sub>8</sub> O <sub>62</sub> /G<br>O                                                     | n-octanal          | MeCN    | air                                          | 60               | Atmospheric pressure | 5            | 100                | This work |

**Table S3.** The contrast tests for the proposed mechanism of ODS reaction.

| System | Final desulfurization ratio/% |
|--------|-------------------------------|
| 1      | 48.05                         |
| 2      | 48.12                         |
| 3      | 62.75                         |
| 4      | 67.13                         |
| 5      | 99.63                         |

Conditions: system 1: the model oil was only treated by extraction of MeCN for 30 min without ODS treatment;

system 2: the model oil was treated by ODS treatment with 200 ml/min air bubbled for 4 h without any catalyst.

system 3: the model oil was treated by ODS treatment with 200 ml/min air bubbled for 4 h with  $K_6[\alpha-P_2W_{18}O_{62}] \cdot 14H_2O$  as catalyst;

system 4: the model oil was treated by ODS treatment with 200 ml/min air bubbled for 4 h with n-octanal as catalyst;

system 5: the model oil was treated by ODS treatment with 200 ml/min air bubbled for 4 h with  $K_6[\alpha-P_2W_{18}O_{62}] \cdot 14H_2O$  and n-octanal as catalysts;

The other conditions were same as described in Figure 3.



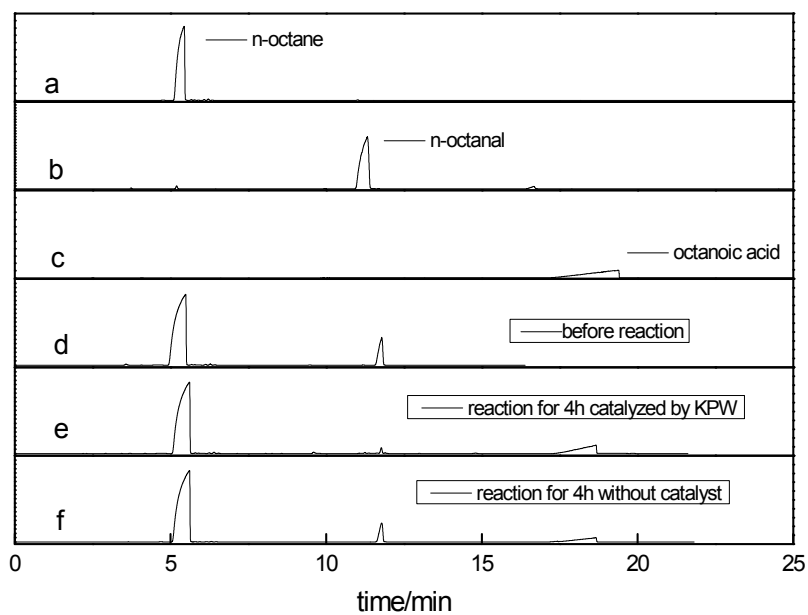

**Fig. S3.** The GC analysis of the oxidation reaction of n-octanal with molecular oxygen (Condition:  $T=60\text{ }^{\circ}\text{C}$ ;  $w_{\text{cat.}}=0.5\%$ ; reaction time is 4 h; the initial n-octanal content is 20 wt%).

REFERENCES

- S1 H. Hori, K. Ogi, Y. Fujita, Y. Yasuda, E. Nagashima, Y. Matsuki and K. Nomiya, *Fuel Process Technol* 2018, 179, 175-183.
- S2 B. Bertleff, J. Claußnitzer, W. Korth, P. Wasserscheid, A. Jess and J. Albert. *ACS Sustainable Chem. Eng.* 2017, 5(5), 4110-4118.
- S3 H. Lü, J. Gao, Z. Jiang, Y. Yang, B. Song and C. Li. *Chem. Commun.* 2007, (2), 150-152.
- S4 W. Zhang, H. Zhang, J. Xiao, Z. Zhao, M. Yu, and Z. Li. *Green. Chem.* 2014, 16 (1), 211-220.
- S5 J. W. Ding and R. Wang. *Chin. Chem. Lett.* 2016, 27 (5), 655-658.
- S6 Y. Zhang and R. Wang. *Diamond. Relat. Mater.* 2017, 73, 161-168.
